# Supplementary material for: Molluscan RXR Transcriptional Regulation by Retinoids in a Drosophila CNS Organ Culture System
Source: MDPI journal article supplement (doi:10.3390/cells11162493), 2022-08-11
Supplement: s1 [file s1]

**Supplementary Materials:**

ATGGTGAGCAAGGGCGAGGAGCTGTTACACGGGGTGGTGCCCATCCTGGTCGAGCTGGA  
CGGCGACGTAAACGGCCACAAGTTCAGCGTGTCCGGCGAGGGCGAGGGCGATGCCACCT  
ACGGCAAGCTGACCCTGAAGTTCATCTGCACCACCGCAAGCTGCCCGTGCCCTGGCCCA  
CCCTCGTGACCACCCTGACCTACGGCGTGCAGTGCTTCAGCCGTACCCCCACCACATGA  
AGCAGCAGCACTTCTCAAGTCCGCCATGCCCGAAGGCTACGTCCAGGAGCGCACCATCT  
TCTTCAAGGGCGACGGCAACTACAAGACCCGCGCCGAGGTGAAGTTCGAGGGCGACACC  
CTGGTGAACCGCATCGAGCTGAAGGGCATCGACTTCAAGGAGGACGGCAACATCCTGGG  
GCACAAGCTGGAGTACAACACAAGCCACAACGTCTATATCATGGCCGACAAGCAGA  
AGAACGGCATCAAGGTGAACCTCAAGATCCGCCACAACATCGAGGACGGCAGCGTGCAG  
CTCGCCGACCACTACCAGCAGAACACCCCCATCGGCGACGGCCCCGTGTGTGCTGCCGA  
CAACCACTACCTGAGCACCAGTCCGCCCTGAGCAAAGACCCCAACGAGAAGCGCGATC  
ACATGGTCTGTGGAGTTCGTGACCGCCGCGGGATCACTCTCGGCATGGCAGAGCTGT  
ACAAGGAGGGCGAGAGGAAGTCTTCTAACATGCGGGTACGTGGAGGAGAATCCCGGCCCT  
GCTAGCATGGGATCGGCCATTGAACAAGATGGATTGCACGCAGGTTCTCCGCGCGCTTGG  
GTGGAGAGGCTATTCCGCTATGACTGGGCACAACAGACAATCCGCTGCTCTGATGCCGCC  
GTGTTCCGGCTGTGAGCGCAGGGGCGCCCGGTTCTTTTGTCAAGACCGACCTGTCCGGTG  
CCCTGAATGAAGTGAAGACGAGGCAGCGCGGCTATCGTGGCTGGCCACGACGGGCGTT  
CCTTGCGCAGCTGTGCTCGACGTTGTCACTGAAGCGGGAAGGGACTGGTGCTATTGGGC  
GAAGTGCCGGGGCAGGATCTCTGTCTCATCTACCTTGCTCCTGCCGAGAAAGTATCCATC  
ATGGCTGATGCAATGCGCGCGCTGCATACGCTTGATCCGGCTACCTGCCCATTCGACCAC  
CAAGCGAAACATCGCATCGAGCGAGCAGTACTCGGATGGAAGCCGGTCTTGTGATCA  
GGATGATCTGGACGAAGAACATCAGGGGCTCGCGCCAGCCGAAGTTCGCCAGGCTCA  
AGGCGAGCATGCCCGACGGCGAGGATCTCGTGTGACCCATGGCGATGCCTGCTTGCCGA  
ATATCATGGTGGAAAATGGCCGCTTTTCTGGATTATCGACTGTGGCCGGCTGGGTGTGGC  
GGACCGCTATCAGGACATAGCGTTGGCTACCCGTGATATTGCTGAAGAACTTGGCGGCGA  
ATGGGCTGACCGCTTCTCGTGTCTTACGGTATCGCCGCTCCCGATTTCGACGGCATCGCC  
TTCTATCGCCTTCTTGACGAGTCTTCGAAGGACGCGGCAGCCTACTGACTTGCGGAGATG  
TCGAAGAGAAACCTGGCCCTATGGACTACAAGACCATGACGGCGATTATAAAGATCAT  
GACATCGACTACAAGGATGACGATGACAAGGAGAACCTGTACTTCCAGTCCGATATCAA  
GCTACTGTCTTCTATCGAACAAGCATGCGATATTTGCCGACTTAAAAAGCTCAAGTGCTCC  
AAAGAAAAAACGAAGTGCGCCAAGTGTCTGAAGAACAACCTGGGAGTGTGCTACTCTCC  
CAAAACCAAAAGGTCTCCGCTGACTAGGGCACATCTGACAGAAGTGAATCAAGGCTAG  
AAAGACTGGAACAGCTATTTCTACTGATTTTCTCGAGAAGACCTTGACATGATTTGAA  
AATGGATTCTTACAGGATATAAAAGCATTTGTAACAGGATTATTTGTACAAGATAATGT  
GAATAAAGATGCCGTCACAGATAGATTGGCTTCAGTGGAGACTGATATGCCTCTAACATT  
GAGACAGCATAGAATAAAGTGGACATCATCAGCTAGCCAGAGAGTGAAGGAAAAAGGG  
GATGGGAGGTAGAGAGCACCAAGTGGAGCCAACAATGACATGCCAGTAGAACAGATCTT  
GGAAGCTGAGCTGGCTGTGACCCTAAGATAGACACATACATAGATGCACAGAAAGATC  
CAGTGACCAACATATGTCAGGCAGCAGATAAACAGCTCTTCACTTTGGTAGAGTGGGCCA  
AACGAATACCTCATTTCACAGAGCTGCCCTTGGAGGATCAAGTTATTCTATTACGAGCAG  
GTTGGAATGAGCTCCTCATAGCAGGCTTCTCCACCGATCCATAATGGCCAAAGATGGAA  
TTCTGTAGCCACAGGCTTGCATGTTTCATCGCAGCAGTGCACACCAGGCAGGTGTGGGCA  
CCATCTTTGACAGAGTTCTAACTGAACTAGTGGCCAAGATGAGAGAGATGAAGATGGAC  
AAAAACAGAACTGGGCTGTCTCAGGGCAGTTGTACTGTTTAAACCCGGATGCTAAAGGGTTG  
ACAGCAGTACAGGAAGTAGAACAGCTGCGTGAAAAAGTTTATGCCTCGTTAGAAGAATA  
CACCAAAACCAGATATCCCGAAGAACCTGGGAGGTTTGCCAAACTTCTTCTACGACTGCC  
TGCACTTAGGTCCATTGGCCTGAAGTGCTGGAACATCTTTCTTCTTAACTTATTGGTG  
ACCAGCCTATCGACACTTTCCTCATGGAGATGCTAGAAAATCCAAGCCCAACGACATAG

Legend: eGFP-T2A-Neo-dT2A-LymRXR ligand sensor

**Figure S1: The DNA sequence of the LymRXR sensor construct.**

The LymRXR sensor construct is comprised of eGFP (green), T2A (blue), Neomycin (Neo) cassette (pink), degenerate T2A (blue) and GAL4 DNA binding domain fused to the LymRXR ligand binding domain (grey).

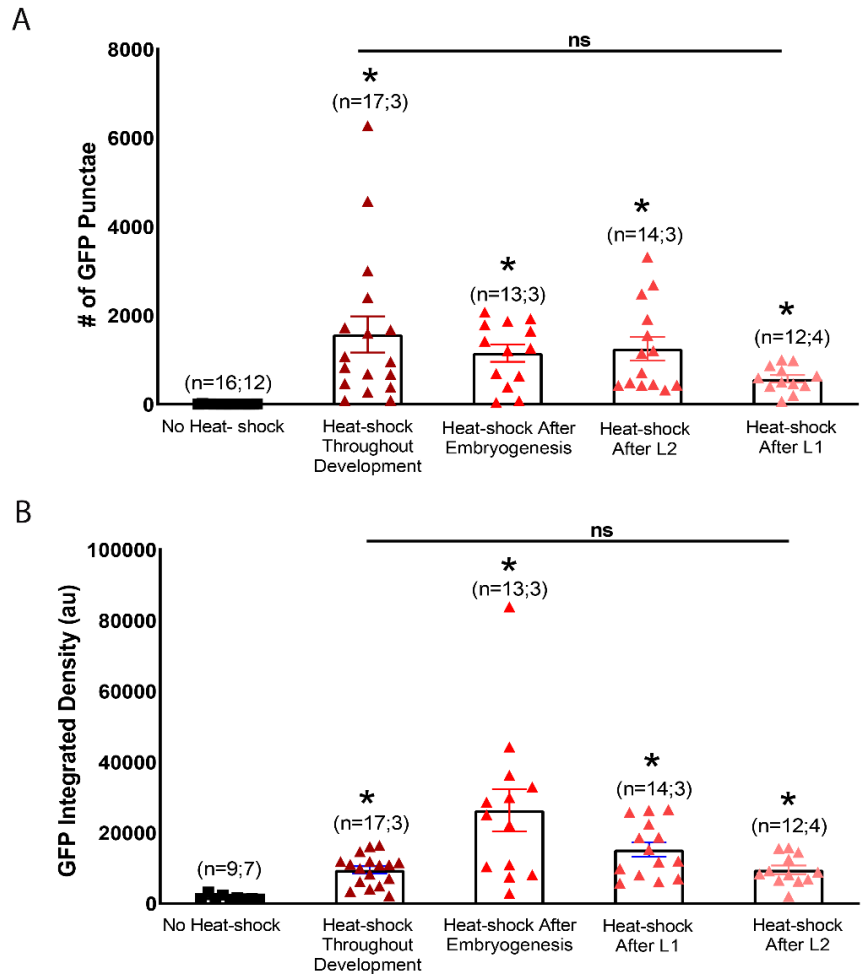

**Figure S2: Quantification of sensor expression following different heat-shock paradigms.** Quantitative analysis of GFP levels showing no significant changes in either the number of GFP punctae (A) or GFP integrated density (B) across larvae, heat-shocked at different developmental stages. All heat-shocked larvae exhibited significantly higher levels of GFP compared to control larvae not subjected to heat-shock. \*  $p < 0.05$ ; compared to no heat-shock controls; ns: no significant difference. Numbers in brackets represent the total number of CNS and the number of separate trials.
